# Supplementary material
Source: PubMed Central journal article supplement (PMC3035073)
Supplement: blood-2010-08-299396_1.pdf [file blood-2010-08-299396_1.pdf]

### **T-cell expansion and adoptive transfer**

The cells were grown in X-VIVO 15™ (Lonza Walkersville, Walkersville, MD) supplemented with 5% pooled human AB serum (Valley Biomedical, Winchester, VA). The cultures were maintained for up to 12 days prior to harvesting and preparation for reinfusion. All infused T-cell products were required to meet release criteria specified for T-cell phenotype, cell viability, pyrogenicity, and freedom from bead contamination. Culture samples were tested for bacteria and fungi two days prior to harvesting, and from the final cellular product. Testing of the final cellular product for bacterial endotoxin (Endosafe, Charles River) and cell phenotype by flow cytometry were also performed. Cell count, cell viability, and endotoxin testing were done to determine whether the final products met specified release criteria. In addition, the absolute number of cells with a plasma-cell immunophenotype in the preharvest or final product had to be less than or equal to the absolute number of cells of the same population in the post-wash/starting (apheresis) product. Plasma cells were identified by pre-gating on viable cells defined by ViaProbe (Becton Dickinson, San Jose, CA) and then collecting and analyzing CD3<sup>-</sup>/CD19<sup>-</sup>/CD38<sup>+</sup>/CD138<sup>+</sup> cells on a Becton Dickinson FACSCalibur with CellQuest software. On the designated infusion date, the T cells were harvested. The beads were removed with a Baxter Fenwal Maxsep® magnetic separator, washed and concentrated with the Baxter Fenwal Harvester System, and resuspended in 100-500 mL 1:1 Plasmalyte A/Dextrose 5%, 0.45% NaCl containing 0.5-1% human serum albumin.

**Table S1. Patient characteristics**

|                                                              | <b>Range (Mean)</b>                                              | <b>Arm A</b>                                    | <b>Arm B</b>                                | <b>p-value</b> |
|--------------------------------------------------------------|------------------------------------------------------------------|-------------------------------------------------|---------------------------------------------|----------------|
| <b># of Patients</b>                                         | 54                                                               | 28                                              | 26                                          |                |
| <b>Age</b>                                                   | 37~68 (55)                                                       | 45 ~ 68 (55.6)                                  | 37 ~ 67 (54.3)                              | 0.74           |
| <b>Race</b>                                                  | White: 32 (59%)<br>AA: 21(39%)<br>Asian: 1 (2%)                  | White: 22 (78%)<br>AA: 5 (18%)<br>Asian: 1 (4%) | White: 10 (38%)<br>AA: 16 (62%)<br>Asian: 0 | 0.003          |
| <b>Gender</b>                                                | Male: 28 (52%)<br>Female: 26 (48%)                               | Male: 16 (57%)<br>Female: 12 (43%)              | Male: 12 (46%)<br>Female: 14 (54%)          | 0.59           |
| <b>Myeloma subtypes</b>                                      | IgA: 15<br>IgG: 35<br>Light chains: 4                            | IgA: 9<br>IgG: 15<br>Light chains: 4            | IgA: 6<br>IgG: 20<br>Light chains: 0        | 0.08           |
| <b>Thal Maint<br/>( pts EFS&gt;180days)*</b>                 | Yes: 24<br>No: 22                                                | Yes: 7<br>No: 17                                | Yes: 17<br>No: 5                            | 0.003          |
| <b>Cytogenetics</b>                                          | Normal: 33 (61%)<br>Abnormal: 21(39%)                            | Normal: 14<br>Abnormal: 14                      | Normal: 19<br>Abnormal: 7                   | 0.14           |
| <b># of prior therapies</b>                                  | One: 27 (50%)<br>Two: 20 (37%)<br>Three: 6 (11%)<br>Four: 1 (2%) | One: 16<br>Two: 10<br>Three: 1<br>Four: 1       | One: 11<br>Two: 10<br>Three: 5<br>Four: 0   | 0.18           |
| <b>Months of prior therapy</b>                               | 1 ~ 48 (6.8)                                                     | 3 ~ 48 (7.5)                                    | 1~17 (6.0)                                  | 0.96           |
| <b>Type of prior therapy (R/T)</b>                           | Yes: 43 (80%)<br>No: 11 (20%)                                    | Yes: 21<br>NO: 7                                | Yes: 22<br>NO: 4                            | 0.59           |
| <b>Prior Bort</b>                                            | Yes: 18 (33%)<br>NO: 36 (67%)                                    | Yes: 8<br>NO: 20                                | Yes: 10<br>NO: 16                           | 0.63           |
| <b>Time from diagnosis to<br/>transplant (days)</b>          | 80 ~ 3433 (338)                                                  | 134 ~ 3433 (382)                                | 80 ~ 704 (289)                              | 0.99           |
| <b>Monoclonal serum protein<br/>at diagnosis</b>             | 0 ~ 10.5 (2.80)                                                  | 0 ~ 10.5 (3.06)                                 | 0.3 ~ 7.3 (2.55)                            | 0.89           |
| <b>% Plasma cells in bone<br/>marrow biopsy at diagnosis</b> | 10 ~ 98 (46)                                                     | 10 ~ 98 (47)                                    | 12 ~ 96 (46)                                | 0.68           |
| <b>% Plasma cells in bone<br/>marrow biopsy at EN</b>        | 1 ~ 95 (27)                                                      | 1 ~ 95 (32)                                     | 3 ~ 90 (20)                                 | 0.38           |
| <b>β-2 microglobulin levels at<br/>EN</b>                    | 0.87 ~ 4.13 (1.91)                                               | 0.87 ~ 3.33 (1.70)                              | 0.93 ~4.13 (2.11)                           | 0.03           |
| <b>Number of Tregs at EN*</b>                                | 0.079 ~ 88.3 (12.6)                                              | 0.97 ~ 35.4 (11.4)                              | 0.079 ~ 88.3<br>(13.7)                      | 0.85           |

**Table S2. Correlations between immune parameters and improved EFS**

| <b>immune parameter at timepoint</b> | <b>P value</b> | <b>improved EFS</b> |
|--------------------------------------|----------------|---------------------|
| CD4 at day 14                        | 0.037          | higher              |
| CD4 at day 60                        | 0.048          | higher              |
| CD4 at day 100                       | 0.013          | higher              |
| CD4 at day 180                       | 0.034          | higher              |
| CD4CD45RO at day 100                 | 0.021          | higher              |
| CD4CD45RO at day 180                 | 0.003          | higher              |
| CD4CCR7 at day 180                   | 0.030          | higher              |
| CD4CD27 at day 100                   | 0.012          | higher              |
| CD4CD27 at day 180                   | 0.007          | higher              |
| CD4CD28 at day 100                   | 0.011          | higher              |
| CD4CD28 at day 180                   | 0.005          | higher              |
| % CD4CD28 at TCH                     | 0.032          | higher              |
| CD8CD45RA at day 14                  | 0.017          | lower               |
| CD8CD45RA at day 60                  | 0.002          | lower               |
| CD8CD45RO at day 180                 | 0.032          | higher              |
| CD8CCR7 at day 60                    | 0.036          | lower               |
| CD8CD27 at day 14                    | 0.005          | lower               |
| CD8CD27 at day 60                    | 0.011          | lower               |
| CD8CD28 at day 14                    | 0.020          | lower               |
| CD8CD28 at day 60                    | 0.031          | lower               |
| % CD4 at day 14                      | 0.034          | higher              |
| % CD4 at day 60                      | 0.017          | higher              |
| % CD4 at day 100                     | 0.033          | higher              |
| % CD8 at day 14                      | 0.017          | lower               |
| % CD8 at day 60                      | 0.015          | lower               |
| % CD8 at day 100                     | 0.049          | lower               |
| % FOXP3+ at TCH                      | 0.047          | lower               |
| % FOXP3+ at day 14                   | 0.002          | lower               |
| % FOXP3+ at day 60                   | 0.004          | lower               |
| % FOXP3+ at day 100                  | <0.001         | lower               |
| % FOXP3+ at day 180                  | <0.001         | lower               |
